# Supplementary material for: Responses of vertical soil moisture to rainfall pulses and land uses in a typical loess hilly area, China
Source: Copernicus journal article supplement (doi:10.5194/se-6-595-2015), 2015-05-28
Supplement: Supplementary file 1 [file se-6-595-2015-supplement.pdf]

Supplement of Solid Earth, 6, 595–608, 2015  
<http://www.solid-earth.net/6/595/2015/>  
doi:10.5194/se-6-595-2015-supplement  
© Author(s) 2015. CC Attribution 3.0 License.

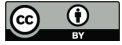

*Supplement of*

## **Responses of vertical soil moisture to rainfall pulses and land uses in a typical loess hilly area, China**

**Y. Yu et al.**

*Correspondence to:* W. Wei (weiwei@rcees.ac.cn)

The copyright of individual parts of the supplement might differ from the CC-BY 3.0 licence.

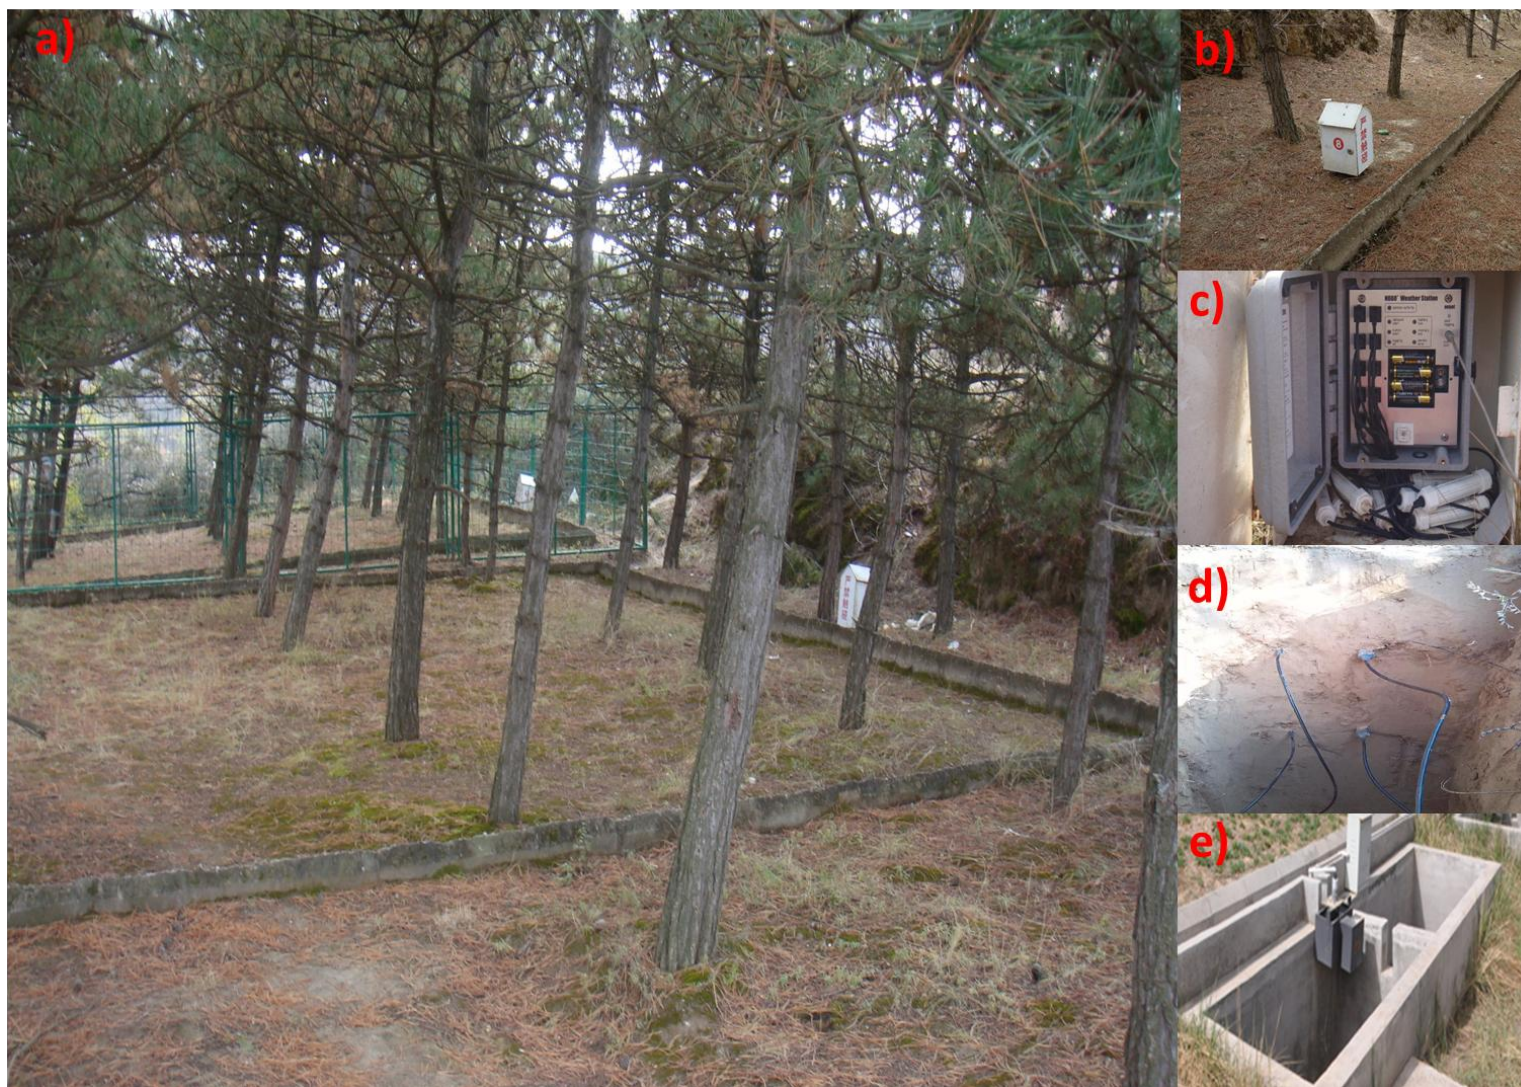

Figure S1  
Take the pine trees plot as an example:  
a): the pine trees plot;  
b): the digital collection equipment (white box at the top of each plot);  
c) and d): 5 soil moisture and 5 temperature smart sensors were installed at 5 depths below the ground;  
e): the H-flume at the outlet of each plot.
